# Supplementary material for: Risk Assessment Considering the Bioavailability of 3-β-d-Glucosides of Deoxynivalenol and Nivalenol through Food Intake in Korea
Source: MDPI journal article supplement (doi:10.3390/toxins15070460), 2023-07-18
Supplement: s1 [file s1]

**Table S1.** Distribution of parameters using Monte Carlo simulation.

| Parameter   |           |           | Unit         | Distribution<br>(fitted parameters) |
|-------------|-----------|-----------|--------------|-------------------------------------|
| Occurrence  | DON group | Raw       | µg/kg        | Weibull                             |
|             |           | Simple    | µg/kg        | Log-normal                          |
|             |           | Fermented | µg/kg        | Log-normal                          |
|             |           | Total     | µg/kg        | Log-normal                          |
|             | NIV group | Raw       | µg/kg        | Gamma, Log-normal                   |
|             |           | Simple    | µg/kg        | Student's <i>t</i> , Logistic       |
|             |           | Fermented | µg/kg        | Log-normal                          |
|             |           | Total     | µg/kg        | Log-normal                          |
| Consumption | Raw       | Infant    | g/day        | Log-normal                          |
|             |           | Adult     | g/day        | Log-normal                          |
|             |           | All ages  | g/day        | Log-normal                          |
|             | Simple    | Infant    | g/day        | Log-normal                          |
|             |           | Adult     | g/day        | Log-normal                          |
|             |           | All ages  | g/day        | Log-normal                          |
|             | Fermented | Infant    | g/day        | Log-normal                          |
|             |           | Adult     | g/day        | Log-normal                          |
|             |           | All ages  | g/day        | Log-normal                          |
|             | Total     | Infant    | g/day        | Log-normal                          |
|             |           | Adult     | g/day        | Log-normal                          |
|             |           | All ages  | g/day        | Log-normal                          |
| bw          | Infant    |           | kg           | Log-normal                          |
|             | Adult     |           | kg           | Gamma                               |
|             | All ages  |           | kg           | Log-normal                          |
| TDI         | DON group |           | µg/kg bw/day | Fixed value 1.0 [7]                 |
|             | NIV group |           | µg/kg bw/day | Fixed value 0.4 (this study)        |

DON, deoxynivalenol; NIV, nivalenol; bw; body weight TDI, tolerable daily intake.

**Table S2.** Summary of main toxicological studies for immunotoxicity and hemotoxicity of nivalenol (NIV).

| Species/sex                   | N    | Duration  | Dose                                                              | Endpoint                        | LOAEL/NOAEL | Reference |
|-------------------------------|------|-----------|-------------------------------------------------------------------|---------------------------------|-------------|-----------|
| C57BL/6CrSlc SPF mice /female | 2–5  | 6 months  | 0, 6, 12, 30 mg NIV/kg diet                                       | Decrease in white blood cells   | 30/12       | [30]      |
|                               | 6    | 1 year    |                                                                   | Decrease in white blood cells   | -/-         |           |
|                               | 10   | 2 years   |                                                                   | Decrease in white blood cells   | -/-         | [31]      |
| C57B16 mice /male             | 10   | 4 weeks   | 0, 0.014, 0.071, 0.355, 1.774, 8.87 mg NIV/kg bw/3 times per week | Increase in serum IgG           | 8.87/1.774  | [32]      |
| F344/DuCrj rats /female       | 9–10 | 90 days   | 0, 6.25, 25, 100 mg NIV/kg diet                                   | Decrease in white blood cells   | 6.25/-      | [33]      |
|                               |      |           |                                                                   | Decrease in red blood cells     | -/-         |           |
|                               |      |           |                                                                   | Decrease in platelets           | 100/25      |           |
|                               |      |           |                                                                   | Decrease in hemoglobin          | 100/25      |           |
| F344/DuCrj rats /male         | 9–10 | 90 days   | 0, 6.25, 25, 100 mg NIV/kg diet                                   | Decrease in white blood cells   | 100/25      | [34]      |
|                               |      |           |                                                                   | Decrease in red blood cells     | 100/25      | [35]      |
|                               |      |           |                                                                   | Decrease in platelets           | 100/25      | [36]      |
|                               |      |           |                                                                   | Decrease in hemoglobin          | -/-         |           |
|                               |      |           |                                                                   | Increase in serum IgM           | 100/25      |           |
| BALB/c mice                   | 5–8  | 4–8 weeks | 0, 12, 24 mg NIV/kg diet                                          | Increase in serum IgA (4 weeks) | 24/12       | [36]      |
|                               |      |           |                                                                   | Increase in serum IgA (8 weeks) | 12/-        |           |

LOAEL, lowest observed adverse effect level; NOAEL, no-observed-adverse-effect level; bw, body weight; -, not mentioned.

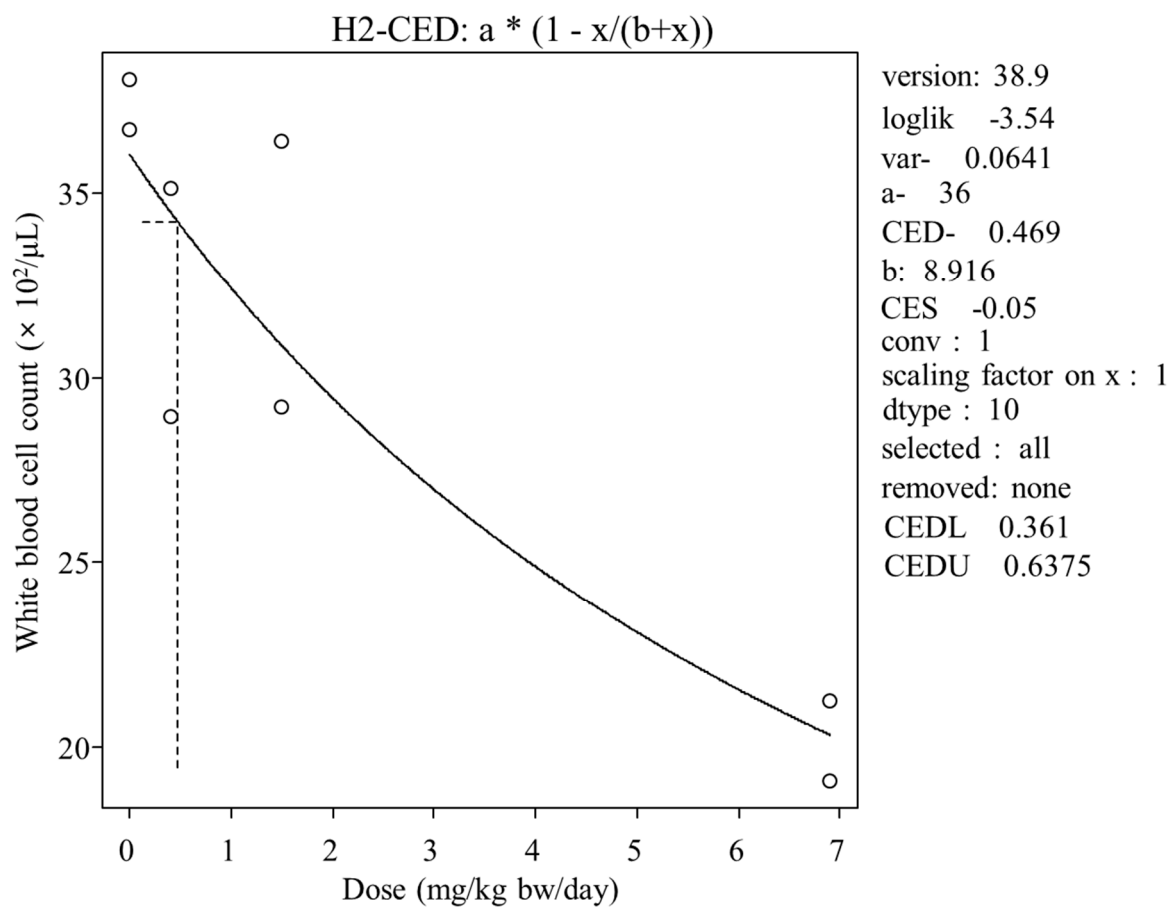

**Figure S1.** Dose–response modeling for white blood cell change with fitted Hill family model H2 of the 90 days subchronic study.
